# Supplementary material for: Constitutive XBP-1s-mediated activation of the endoplasmic reticulum unfolded protein response protects against pathological tau
Source: PubMed Central journal article supplement (PMC6768869; doi:10.1038/s41467-019-12070-3), 2019-09-30
Supplement: 41467_2019_12070_MOESM1_ESM.pdf [file 41467_2019_12070_MOESM1_ESM.pdf]

## **Supplementary Information**

**Constitutive XBP-1s-mediated activation of the endoplasmic reticulum unfolded protein response protects against pathological tau**

Waldherr, et al.

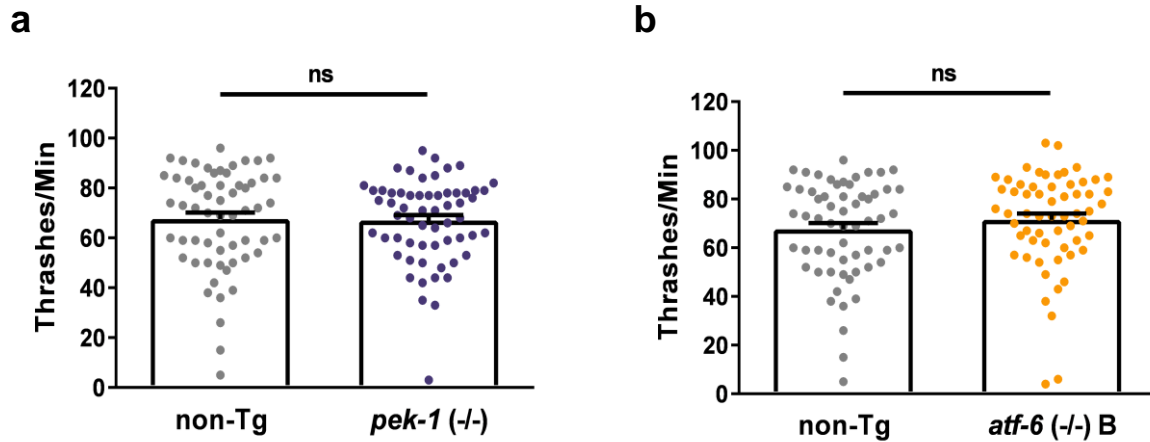

**Supplementary Figure 1: Loss of function of the UPR<sup>ER</sup> PEK-1 and ATF-6 branches does not affect locomotion in *C. elegans*.** **a** Loss of *pek-1* function does not affect behavior observed in a liquid environment [ $n = 60$  animals;  $N = 4$  biologically independent experiments; statistical analysis is by unpaired  $t$ -test, two-tailed (ns:  $p = 0.8674$ )]. **b** Loss of *atf-6* function does not affect behavior observed in a liquid environment. [ $n = 60$  animals;  $N = 4$  biologically independent experiments; statistical analysis is by unpaired  $t$ -test, two-tailed (ns:  $p = 0.2797$ )]. Bar graphs represent mean + SEM.

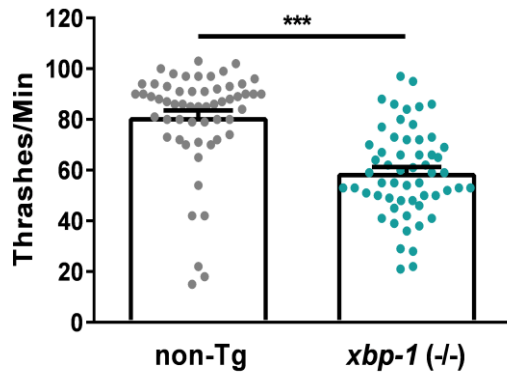

**Supplementary Figure 2: Loss of function of the UPR<sup>ER</sup> XBP-1 branch causes locomotion defects in *C. elegans*.** Loss of *xbp-1* function causes mild behavioral defects observed in a liquid environment [ $n = 57$  animals;  $N = 3$  biologically independent experiments; statistical analysis is by unpaired  $t$ -test, two-tailed ( $***p < 0.0001$ )]. Bar graph represents mean + SEM.

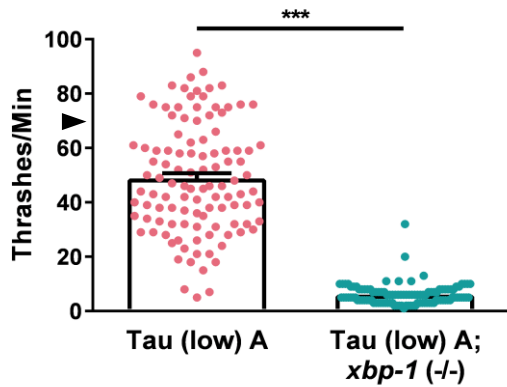

**Supplementary Figure 3: Loss of function of the UPR<sup>ER</sup> XBP-1 branch enhances locomotion defects in an independent tau transgenic *C. elegans* model.** Loss of *xbp-1* function in a wildtype tau low expression background enhances mild behavioral defects observed in a liquid environment [ $n = 110$  animals;  $N = 7$  biologically independent experiments; statistical analysis is by unpaired  $t$ -test, two tailed ( $***p < 0.0001$ )]. Bar graph represents mean + SEM. Arrowhead on y-axis denotes non-Tg animals average ~70 thrashes/minute under standard laboratory conditions.

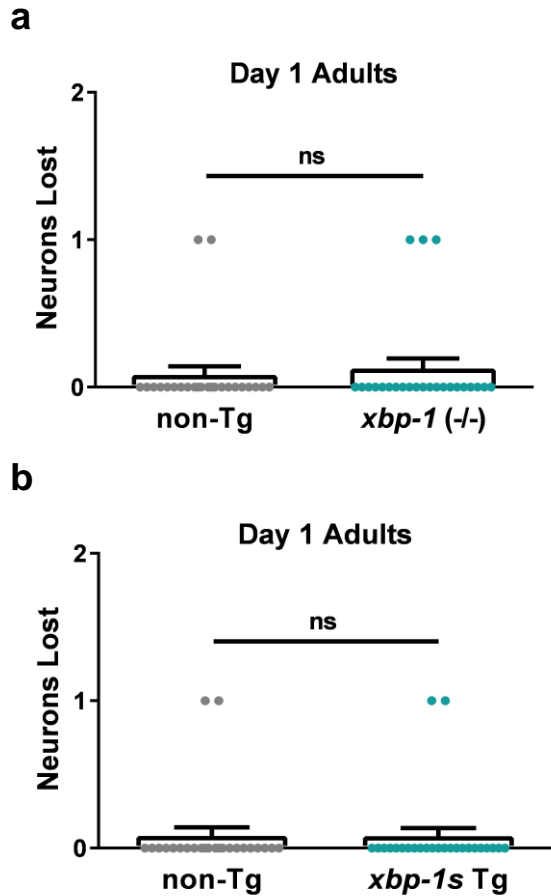

**Supplementary Figure 4: Genetic manipulation of the UPR<sup>ER</sup> XBP-1 branch does not cause neuronal loss in *C. elegans*.** **a** Loss of *xbp-1* function does not cause neuronal loss in adult animals. The number of D-type GABAergic ventral nerve cord neurons lost at day one of adulthood [ $n = 24$  animals;  $N = 2$  biologically independent experiments; statistical analysis is by unpaired  $t$ -test, two-tailed (ns:  $p = 0.6451$ )] is plotted. **b** Neuronal overexpression of *xbp-1s* does not cause neuronal loss in adult animals. The number of D-type GABAergic ventral nerve cord neurons lost at day one of adulthood [ $n = 24$  and  $25$  animals, respectively;  $N = 2$  biologically independent experiments; statistical analysis is by unpaired  $t$ -test, two-tailed (ns:  $p = 0.9669$ )] is plotted. Bar graph represents mean + SEM.

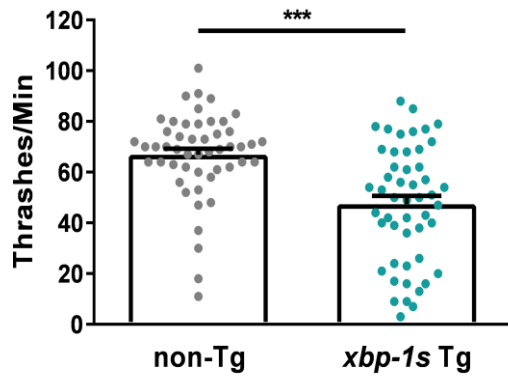

**Supplementary Figure 5: Constitutive UPR<sup>ER</sup> activation by neuronal overexpression of *xbp-1s* causes behavioral defects in *C. elegans*.** Neuronal overexpression of *xbp-1s* causes mild behavioral defects observed in a liquid environment [ $n = 50$  animals;  $N = 3$  biologically independent experiments; statistical analysis is by unpaired  $t$ -test, two-tailed (\*\* $p < 0.0001$ )]. Bar graph represents mean + SEM.

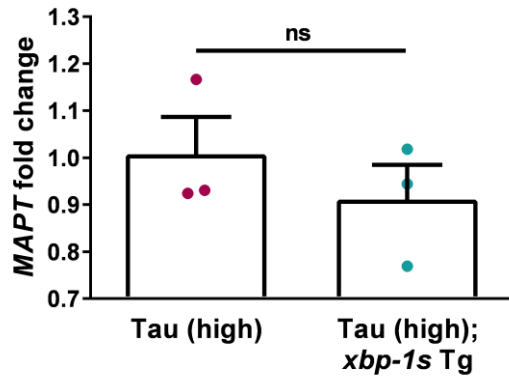

**Supplementary Figure 6: Constitutive UPR<sup>ER</sup> activation by neuronal overexpression of *xbp-1s* does not alter human *MAPT* transcript levels in tau transgenic *C. elegans*.** Neuronal overexpression of *xbp-1s* in a wildtype tau high expression background does not affect human *MAPT* gene expression levels in adult animals. *MAPT* gene expression levels normalized to *C. elegans rpl-32* gene expression levels are plotted [ $N = 3$  biologically independent experiments (with three technical replicates within each experiment)]; statistical analysis is by unpaired *t*-test, two-tailed (ns:  $p = 0.4250$ )]. Bar graph represents mean + SEM.

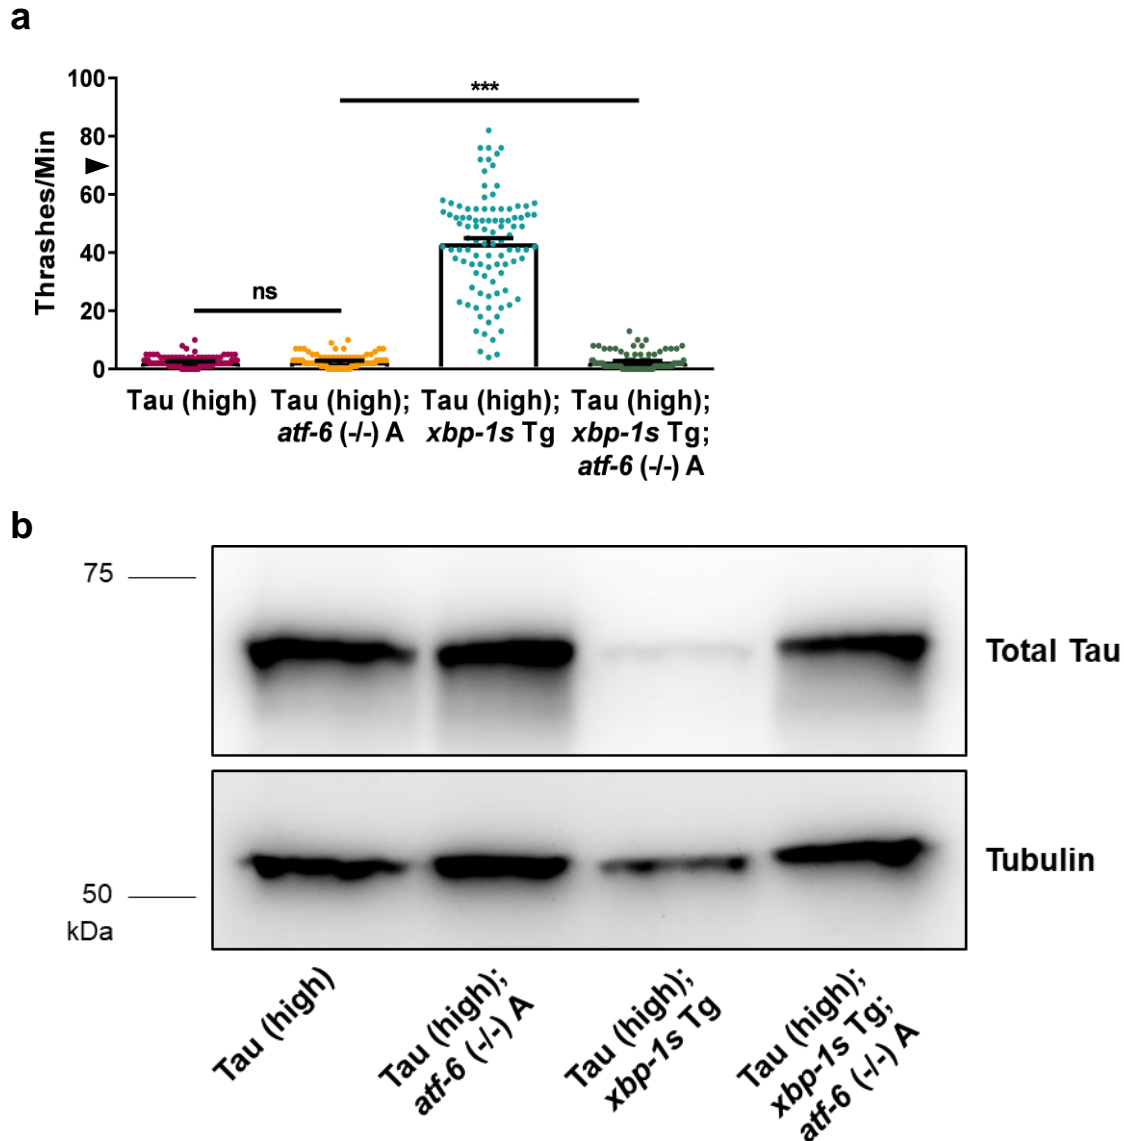

**Supplementary Figure 7: Loss of function of the UPR<sup>ER</sup> ATF-6 branch using an independent allele abolishes *xbp-1s*-mediated tauopathy suppression in tau transgenic *C. elegans*.** **a** Loss of *atf-6* function abolishes the ability of neuronal overexpression of *xbp-1s* in a wildtype tau high expression background to suppress severe behavioral defects observed in a liquid environment [ $n = 100$  animals;  $N = 7$  biologically independent experiments; statistical analysis is by one-way ANOVA, followed by Tukey's post-test ( $***p < 0.0001$ )]. Bar graph represents mean + SEM. Arrowhead on y-axis denotes non-Tg animals average ~70 thrashes/minute under standard laboratory conditions. **b** Loss of *atf-6* function abolishes the ability of neuronal overexpression of *xbp-1s* in Tau (high) animals to decrease soluble tau protein levels. Immunoblots for total tau and tubulin are shown for one biologically independent experiment.



**Supplementary Table 1: *C. elegans* Strains and Transgenics**

| Abbreviation          | Strain # | Genotype                                                             | Outcrossed | Source         |
|-----------------------|----------|----------------------------------------------------------------------|------------|----------------|
| non-Tg                | N2       | Bristol, Great Britain wildtype isolate                              | 0x         | CGC            |
| Tau (WT High)         | CK144    | <i>aex-3p::hTau</i> (4R1N); <i>myo-2p::gfp</i>                       | 2x         | <sup>20</sup>  |
| Tau (WT Low)<br>A     | CK1044   | <i>aex-3p::hTau</i> (4R1N); <i>myo-2p::gfp</i>                       | 2x         | <sup>20</sup>  |
| Tau (WT Low)<br>B     | CK1441   | <i>aex-3p::hTau</i> (4R1N); <i>myo-2p::dsRED</i>                     | 2x         | This Study     |
| <i>xbp-1s</i> Tg      | AGD927   | <i>uthIs270 [rab-3p::xbp-1s; myo-2p::tdTomato]</i>                   | 8x         | <sup>12</sup>  |
| GABAergic<br>Reporter | EG1285   | <i>lin-15B &amp; lin-15A(n765); oxIs12 [unc-47p::gfp] X</i>          | 0x         | CGC            |
| <i>pek-1</i> (-/-)    | RB545    | <i>pek-1(ok275) X</i>                                                | 2x         | CGC            |
| <i>atf-6</i> (-/-) A  | Tm1153   | <i>atf-6(tm1153) X</i>                                               | 2x         | Crowder<br>lab |
| <i>atf-6</i> (-/-) B  | RB772    | <i>atf-6(ok551) X</i>                                                | 2x         | CGC            |
| <i>xbp-1</i> (-/-)    | SJ17     | <i>xbp-1(zc12) III; zcls4 [hsp-4p::gfp] V</i>                        | 2x         | CGC            |
| <i>sel-11</i> (-/-)   | MT14875  | <i>nDf59 V</i>                                                       | 2x         | CGC            |
| CP450 (ER)            | CX10344  | <i>unc-25::calf-1::gfp, unc-25::CP450::mCherry,<br/>odr-1::dsRED</i> | 0x         | <sup>24</sup>  |

**Supplementary Table 2: Protein Antibodies**

| Antigen                  | Clone/<br>Product Name                        | Dilution | Host<br>Species | Source                                                                                                                                                               | Catalog #   |
|--------------------------|-----------------------------------------------|----------|-----------------|----------------------------------------------------------------------------------------------------------------------------------------------------------------------|-------------|
| $\beta$ -Tubulin         | E7 mAb                                        | 1:5,000  | Mouse           | Developmental Studies Hybridoma Bank (Iowa City, IA, USA)                                                                                                            | N/A         |
| Tau (Total)              | SP70 pAb                                      | 1:1,000  | Rabbit          | Rockland Immunochemicals Inc. (Limerick, PA, USA)                                                                                                                    | 200-C01-B33 |
| pTau Ser202              | CP13 mAb                                      | 1:500    | Mouse           | Peter Davies (Litwin-Zucker Research Center for the Study of Alzheimer's Disease, The Feinstein Institute of Medical Research, Northwell Health, Manhasset, NY, USA) | N/A         |
| pTau Ser396/Ser404       | PHF-1 mAb                                     | 1:2,000  | Mouse           |                                                                                                                                                                      |             |
| pTau Ser422              | EPR2866 mAb                                   | 1:500    | Rabbit          | Abcam (Cambridge, UK)                                                                                                                                                | ab79415     |
| pTau Thr181              | AT270 mAb                                     | 1:15,000 | Mouse           | ThermoFisher Scientific (Waltham, MA, USA)                                                                                                                           | MN1050      |
| Tau (Total)              | K9JA (DAKO) pAb                               | 1:250    | Rabbit          | Agilent Technologies, Inc. (Santa Clara, CA, USA)                                                                                                                    | A002401-2   |
| mCherry                  | 2F4 mAb                                       | 1:250    | Mouse           | Elabscience Biotechnology, Inc. (Houston, TX, USA)                                                                                                                   | E-AB-20087  |
|                          |                                               |          |                 |                                                                                                                                                                      |             |
| 2 <sup>o</sup> Ab Mouse  | Horseradish Peroxidase $\alpha$ -Ms IgG (H+L) | 1:5,000  | Goat            | Jackson ImmunoResearch (West Grove, PA, USA)                                                                                                                         | 115-035-146 |
| 2 <sup>o</sup> Ab Rabbit | Horseradish Peroxidase $\alpha$ -Rb IgG (H+L) | 1:5,000  | Goat            | Jackson ImmunoResearch (West Grove, PA, USA)                                                                                                                         | 111-035-144 |
| 2 <sup>o</sup> Ab Mouse  | Alexa Fluor® 568 Goat $\alpha$ -Ms IgG (H+L)  | 1:1,000  | Goat            | Invitrogen (Carlsbad, CA, USA)                                                                                                                                       | A-11004     |
| 2 <sup>o</sup> Ab Rabbit | Alexa Fluor® 647 Goat $\alpha$ -Rb IgG (H+L)  | 1:1,000  | Goat            | Invitrogen (Carlsbad, CA, USA)                                                                                                                                       | A-21245     |

**Supplementary Table 3: Measurement of pTau Immunoblot Signal**

| Protein                   | Normalized to Tubulin             |                                                  |                 | Normalized to Total Tau           |                                                  |                 |
|---------------------------|-----------------------------------|--------------------------------------------------|-----------------|-----------------------------------|--------------------------------------------------|-----------------|
|                           | Tau (high) Mean<br>+/- SEM (a.u.) | Tau (high); <i>xbp-1s</i><br>Mean +/- SEM (a.u.) | <i>p</i> -value | Tau (high) Mean<br>+/- SEM (a.u.) | Tau (high); <i>xbp-1s</i><br>Mean +/- SEM (a.u.) | <i>p</i> -value |
| pTau<br>Thr181            | 0.81 +/- 0.040                    | 0.079 +/- 0.021                                  | ***<br>(0.0006) | 0.69 +/- 0.082                    | 0.40 +/- 0.055                                   | *<br>(0.0254)   |
| pTau<br>Ser202            | 0.73 +/- 0.057                    | 0.058 +/- 0.0040                                 | **<br>(0.0012)  | 0.63 +/- 0.090                    | 0.34 +/- 0.055                                   | ns<br>(0.1051)  |
| pTau<br>Ser396/Ser<br>404 | 0.57 +/- 0.17                     | 0.059 +/- 0.028                                  | *<br>(0.0386)   | 0.52 +/- 0.18                     | 0.27 +/- 0.12                                    | *<br>(0.0412)   |
| pTau<br>Ser422            | 0.57 +/- 0.11                     | 0.049 +/- 0.020                                  | *<br>(0.0135)   | 0.50 +/- 0.12                     | 0.24 +/- 0.090                                   | *<br>(0.0478)   |
| Total Tau                 | 1.21 +/- 0.14                     | 0.18 +/- 0.042                                   | **<br>(0.0061)  |                                   |                                                  |                 |

Densitometry analysis of chemiluminescence signals for phosphorylated tau species normalized to tubulin and total tau ( $N = 4$  biologically independent experiments; statistical analysis is by paired  $t$ -test, two-tailed; a.u. = arbitrary units).
